# Supplementary material for: Engineering non-covalently assembled protein nanoparticles for long-acting gouty arthritis therapy
Source: Royal Society of Chemistry journal article supplement (doi:10.1039/d1tb01760h), 2021-01-01
Supplement: d1tb01760h1.pdf [file d1tb01760h1.pdf]

## Supporting information

### **Engineering non-covalently assembled protein nanoparticles for long-acting gouty arthritis therapy**

Jinrui Zhang<sup>1,2#</sup>, Yao Sun<sup>3#</sup>, Qian Qu<sup>3#</sup>, Bo Li<sup>2</sup>, Lili Zhang<sup>4</sup>, Rui Gu<sup>1</sup>, Jianlin Zuo<sup>1</sup>, Wei Wei<sup>4\*</sup>, Chao Ma<sup>3</sup>, Lei Liu<sup>3</sup>, Kai Liu<sup>2,3\*</sup>, Jingjing Li<sup>2\*</sup>, Hongjie Zhang<sup>2,3</sup>

1. Department of Orthopedics, China-Japan Union Hospital of Jilin University, 130033, Changchun, China

2. State Key Laboratory of Rare Earth Resource Utilization, Changchun Institute of Applied Chemistry, Chinese Academy of Sciences, Changchun 130022, China

3. Department of Chemistry, Tsinghua University, 100084, Beijing, China

4. Key Laboratory of Organ Regeneration & Transplantation of the Ministry of Education, Institute of Translational Medicine, Institute of Virology and AIDS Research, The First Hospital of Jilin University, Changchun, Jilin Province 130061, China.

#These authors contributed equally to this work

Corresponding Authors:

\*Jingjing Li, E-mail: [jjingli@ciac.ac.cn](mailto:jjingli@ciac.ac.cn); Wei Wei, E-mail: [wwei6@jlu.edu.cn](mailto:wwei6@jlu.edu.cn); Kai Liu. E-mail: [kailiu@tsinghua.edu.cn](mailto:kailiu@tsinghua.edu.cn).

**Figures**

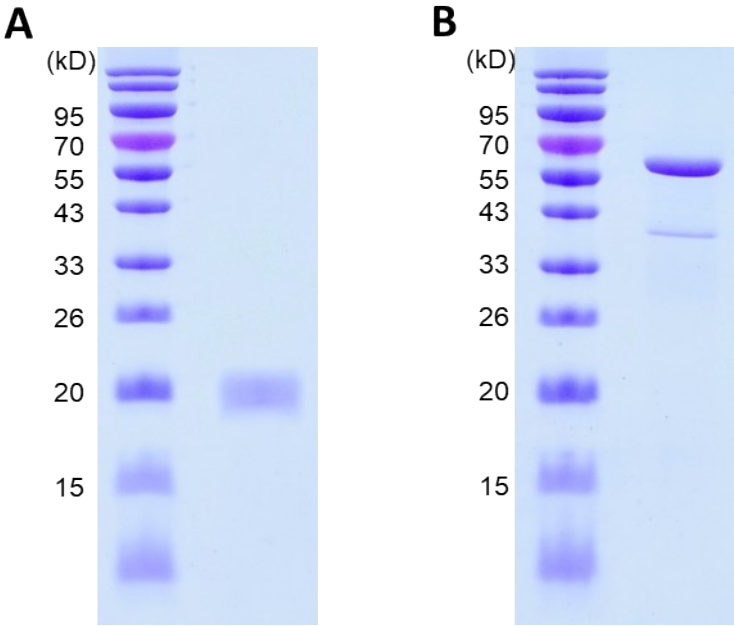

**Figure S1.** SDS-PAGE analysis of (A) the IL-1Ra protein and (B) the IK-Pr. The protein purity was 97% and 91%, respectively.

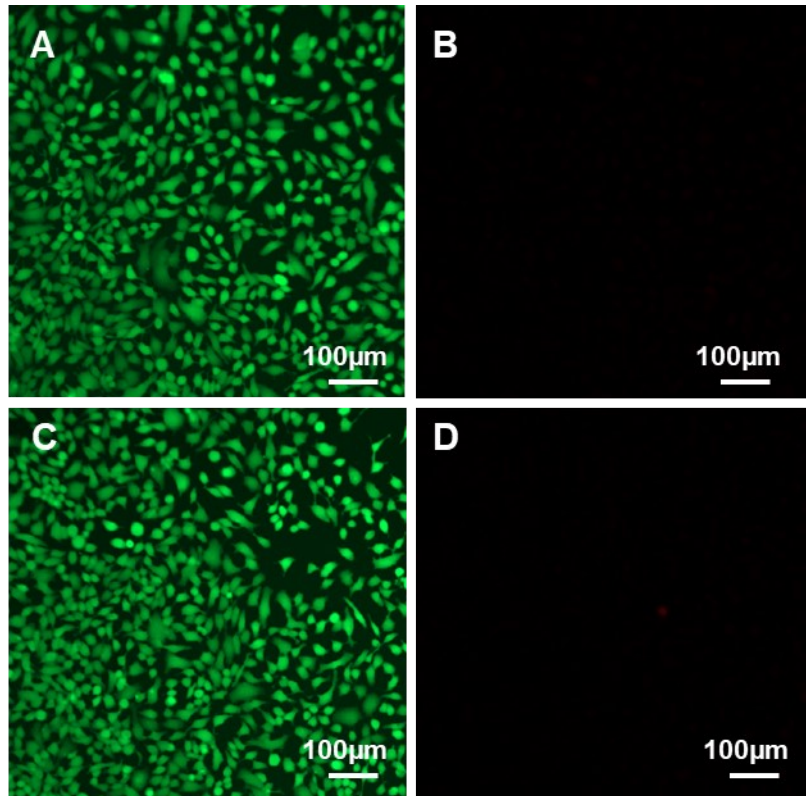

**Figure S2.** Confocal laser scanning microscope (CLSM) was used for analysis of the biocompatibility and cytotoxicity of the IK-Np. (A) and (B) showed BMSCs in blank control group stained by calcein-AM and propidium iodide (PI), respectively. (C) and (D) showed BMSCs stained by calcein-AM and PI after co-incubated with 400  $\mu\text{g}/\text{mL}$  of the IK-Np for 48 hours, respectively. Scale bar: 100  $\mu\text{m}$ . The results illustrated excellent biocompatibility of the IK-Np.

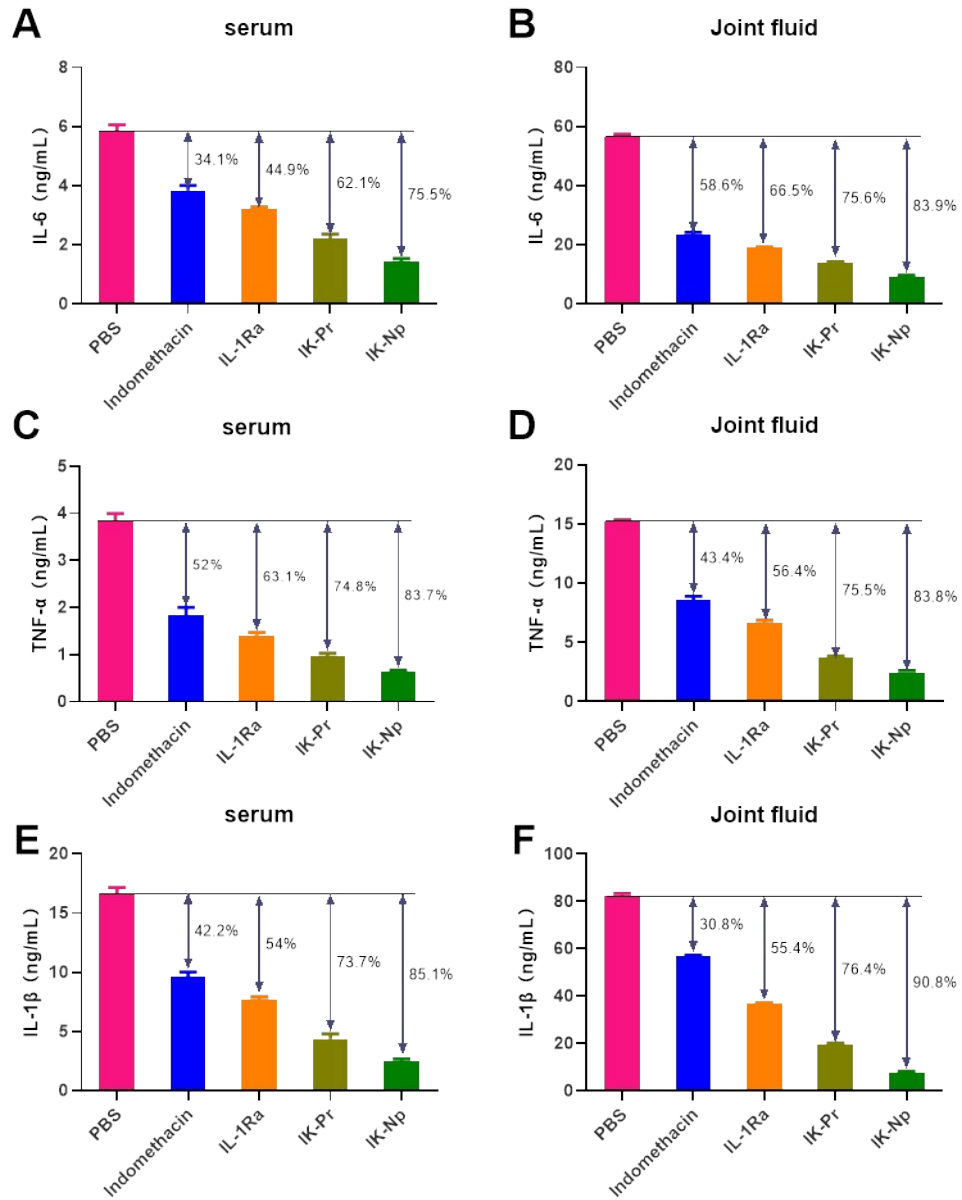

**Figure S3.** Cytokines in the plasma and joint fluid of rats after therapy were detected by ELISA. (A) and (B) showed the levels of IL-6 in serum and joint fluid of rats, respectively. (C) and (D) showed the levels of TNF- $\alpha$  in serum and joint fluid of rats, respectively. (E) and (F) showed the levels of IL-1 $\beta$  in serum and joint fluid of rats, respectively.

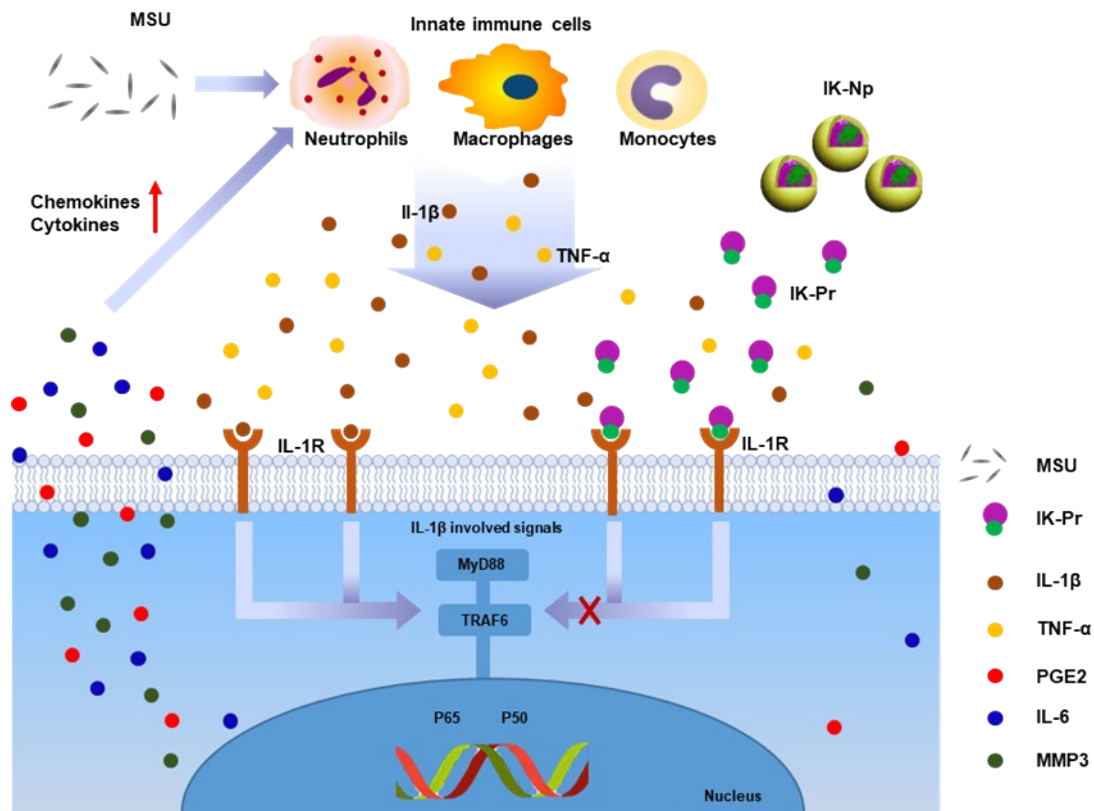

**Figure S4.** Illustration of potential mechanism of the IK-Np involving the inhibition of IL-1 $\beta$  signal pathway. MSU crystals stimulated innate immune cells including macrophages, monocytes and neutrophils, facilitating the production of active IL-1 $\beta$  and TNF- $\alpha$ . IL-1 $\beta$  further binds to IL-1 receptor (IL-1R) of surrounding synoviocytes and chondrocytes, resulting in inflammation process. Downstream cytokines (such as PGE2, MMP3 and IL-6) subsequently were secreted, promoting the inflammatory cascades and causes tissue damage through various signal pathways. The IK-Prs are slowly released from the nanoassembled IK-Np and reached to nidus during systemic circulation, where the IK-Pr can competitively bind to IL-1R and suppress the IL-1 $\beta$  signal pathway, resulting in alleviation of inflammatory reaction.

**Table S1. Half-lives of different therapeutics based on IL-1Ra**

| Therapeutics based on IL-1Ra | Modification strategy                                                                  | Half-life (hour)                    | Formation           | Mode of administration        | Source                                                                                                    |
|------------------------------|----------------------------------------------------------------------------------------|-------------------------------------|---------------------|-------------------------------|-----------------------------------------------------------------------------------------------------------|
| <b>IK-Np</b>                 | <b>Fusing of IL-1Ra with ELP and PEGylation</b>                                        | <b>27.16</b>                        | <b>Nanoparticle</b> | <b>Subcutaneous injection</b> | <b>This study</b>                                                                                         |
| Anakinra                     | Human IL-1Ra expressed in <i>E. coli</i>                                               | 4-6                                 | Protein             | Subcutaneous injection        | FDA-approved drug ( <a href="https://www.drugs.com/kineret.html">https://www.drugs.com/kineret.html</a> ) |
| IL-1Ra-PF127                 | IL-1Ra loaded in Pluronic F-127 gels                                                   | 12.53±2.48                          | Polymer-based gel   | Subcutaneous injection        | Akash M. S. H. et al., 2013 <sup>1</sup>                                                                  |
| IL-1Ra-HSA                   | Fusing human serum albumin (HSA) to the carboxyl terminal of IL-1Ra                    | 9.8 ± 1.7                           | Recombinant protein | Intravenous injection         | Liu M. et al., 2012 <sup>2</sup>                                                                          |
| dAbm16-IL-1Ra                | Fusing the Anti-serum albumin domain antibodies (dAbs) to the amino terminal of IL-1Ra | 4.3                                 | Recombinant protein | Intravenous injection         | Holt L. J. et al., 2008 <sup>3</sup>                                                                      |
| IL-1Ra-MPs                   | IL-1Ra loaded by mineral coated microparticles (MPs)                                   | detectable in serum within 24 hours | Microparticle       | Local bolus injection         | Clements A. E. B. et al., 2018 <sup>4</sup>                                                               |

## References

- 1 M. S. H. Akash, K. Rehman, H. Sun and S. Chen, *PLoS One*, 2013, **8**, e55925.
- 2 M. Liu, Y. Huang, L. Hu, G. Liu, X. Hu, D. Liu and X. Yang, *BMC Biotechnol.*, 2012, **12**, 1–13.
- 3 L. J. Holt, A. Basran, K. Jones, J. Chorlton, L. S. Jespers, N. D. Brewis and I. M. Tomlinson, *Protein Eng. Des. Sel.*, 2008, **21**, 283–288.
- 4 A. E. B. Clements, E. R. Groves, C. S. Chamberlain, R. Vanderby and W. L. Murphy, *Adv. Healthc. Mater.*, 2018, **7**, 1800263.
